# Supplementary material for: Giant unilateral electric-field control of magnetic anisotropy in MgO/Rh2CoSb heterojunctions
Source: Royal Society of Chemistry journal article supplement (doi:10.1039/d3cp02542j), 2023-01-01
Supplement: d3cp02542j1.pdf [file d3cp02542j1.pdf]

## Giant unilateral electric field control of magnetic anisotropy in

### MgO/Rh<sub>2</sub>CoSb heterojunctions

Shiming Yan, Yue Hu, Deyou Jin, Ru Bai, Wen Qiao,\* Tiejun Zhou\*<sup>□</sup>

*School of Electronics and Information, Hangzhou Dianzi University, Hangzhou 310018, China*

\* Email: wqiao@hdu.edu.cn, tjzhou@hdu.edu.cn

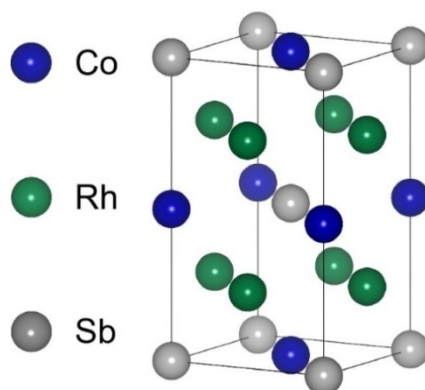

Fig. S1 The crystal structure of Rh<sub>2</sub>CoSb. The sites of the lattice with space group *I*4/*mmm* (139) are occupied as follows: *4d* (0 1/2 1/4), Rh; *2b* (0 0 1/2), Co; and *2a* (0 0 0), Sb.

Table S1 The Rh-O bond lengths and total magnetic moments of MgO/Rh<sub>2</sub>...Rh<sub>2</sub> heterojunction under different convergence criterion of ionic relaxations with force less than 10<sup>-2</sup> eV/Å .

| EDIFF/EDIFFG          | 10×10 <sup>-6</sup><br>eV/0.01 eV/Å | 10×10 <sup>-7</sup><br>eV/0.01 eV/Å | 10×10 <sup>-8</sup><br>eV/0.01 eV/Å | 10×10 <sup>-8</sup><br>eV/0.001 eV/Å | 10×10 <sup>-8</sup><br>eV/0.0001 eV/Å |
|-----------------------|-------------------------------------|-------------------------------------|-------------------------------------|--------------------------------------|---------------------------------------|
| Rh-O bond length      | 2.28228 Å                           | 2.28294 Å                           | 2.28313 Å                           | 2.28329 Å                            | 2.28273 Å                             |
| Total magnetic moment | 9.626 μ <sub>B</sub>                | 9.616 μ <sub>B</sub>                | 9.621 μ <sub>B</sub>                | 9.625 μ <sub>B</sub>                 | 9.627 μ <sub>B</sub>                  |

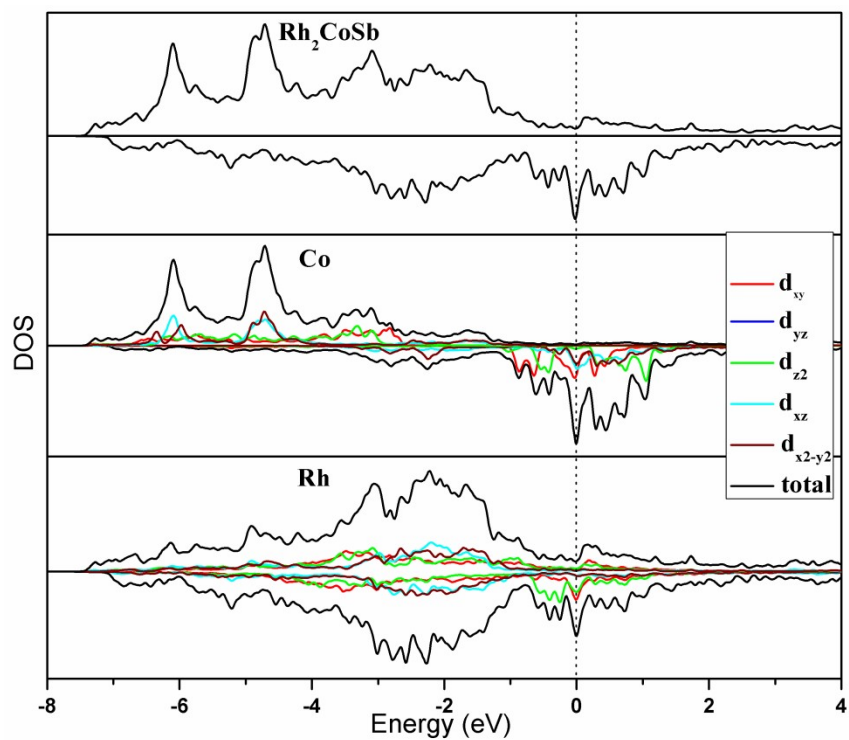

Fig. S2 DOS of  $\text{Rh}_2\text{CoSb}$  (a) and PDOS of Co (b) and Rh (c) in the  $\text{MgO}/\text{Rh}_2\text{CoSb}/\text{Rh}_2$  heterojunction.

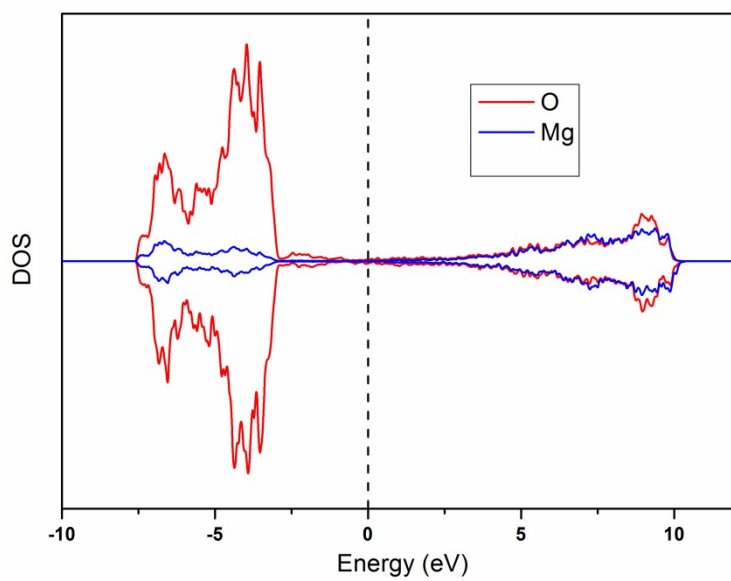

Fig. S3 DOS of MgO in the  $\text{MgO}/\text{Rh}_2\text{CoSb}/\text{Rh}_2$  heterojunction.

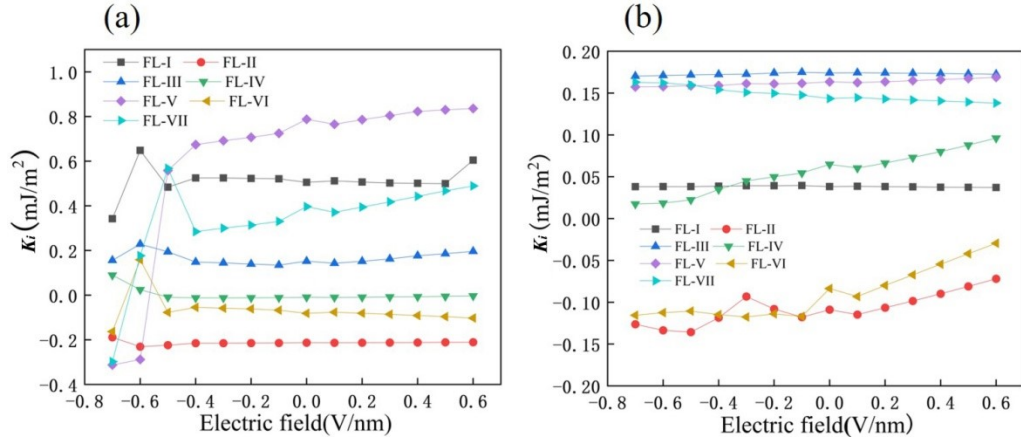

Fig. S4 Layer-resolved  $K_i$  of MgO/Rh<sub>2</sub>...Rh<sub>2</sub>(a) and MgO/Co...CoSb (b) heterojunctions under different electric fields.

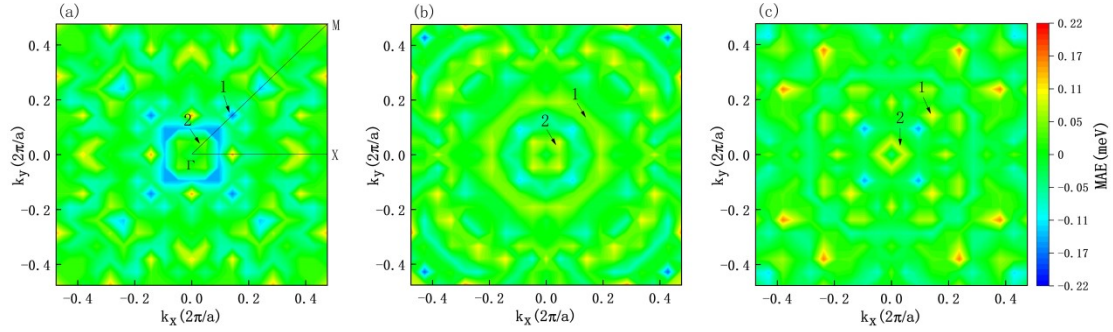

Fig. S5  $k$ -resolved  $K_i$  of the fourth-layer Rh atom in the MgO/Co...CoSb heterojunction. (a), (b) and (c) are the electric fields of  $-0.4 \text{ V}/\text{\AA}$ ,  $0 \text{ V}/\text{\AA}$  and  $0.4 \text{ V}/\text{\AA}$ , respectively.

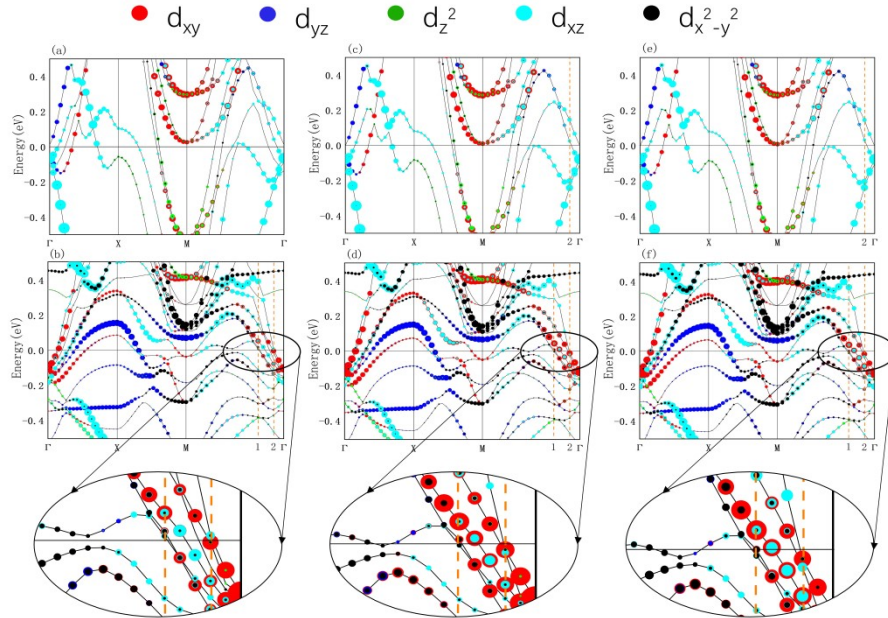

Fig. S6 The  $d$ -orbital-projected band structure of the fourth-layer Rh atom in the MgO/Co...CoSb heterojunction. (a), (c) and (e) are in the spin-up state and (b), (d) and (f) are in the spin-down state, under electric fields of  $-0.4 \text{ V}/\text{\AA}$ ,  $0 \text{ V}/\text{\AA}$  and  $0.4 \text{ V}/\text{\AA}$ , respectively.

In the MgO/Co...CoSb heterojunctions, as shown in Fig. S4 (b), the electric field has a greater effect on Rh atoms in layers 2, 4 and 6, but a weak effect on Co atoms in layers 1, 3, 5 and 7. We chose the fourth-layer with obvious changes to study it. The  $d$ -orbital-projected band structures and the  $k$ -resolved MAE of the fourth-layer Rh atom in the MgO/Co...CoSb are shown in Fig. S5 and Fig. S6. As shown in Fig. S5(a) and Fig. S6(a), the negative MAE at  $k$  point 1 arises from the coupling between the occupied minority-spin state  $d_{xz}$  and the unoccupied minority-spin state  $d_{x^2-y^2}$  along M- $\Gamma$ . The negative MAE at  $k$  point 2 arises from the coupling between the occupied minority-spin state  $d_{xy}$  and the unoccupied minority-spin state  $d_{xz}$  along M- $\Gamma$ . As the electric field increases, the MAE at  $k$  points 1 and 2 change from negative to positive, as shown in Fig. S5 (a), (b) and (c). At  $k$  point 1, the unoccupied minority-spin state  $d_{x^2-y^2}$  orbital near the Fermi level moves downward, and the unoccupied state of  $d_{x^2-y^2}$  orbital becomes occupied state, resulting in that negative MAE becomes positive MAE. The positive MAE at  $k$  point 1 arises from the coupling between the occupied minority-spin state  $d_{x^2-y^2}$  and the unoccupied minority-spin state  $d_{xy}$  along M- $\Gamma$ , as shown in Fig. S6 (d) and (f). At  $k$  point 2, the unoccupied minority-spin state  $d_{xz}$  orbital near the Fermi surface moves downward, and the  $d_{xz}$  orbital becomes the occupied state from the unoccupied state. The positive MAE at  $k$  point 2 arises from the coupling between the occupied minority-spin state  $d_{xy}$  and the unoccupied majority-spin state  $d_{xz}$  along M- $\Gamma$ , as shown in Fig. S6 (c), (d), (e) and (f).
